# Supplementary material
Source: bioRxiv or medRxiv preprint supplement (http://biorxiv.org/highwire/filestream/86018/field_highwire_adjunct_files/1/082396-2.pdf)
Supplement: Supplementary file [file 082396-2.pdf]

## SUPPORTING INFORMATION 2

### Impact of number of exposures on the interpretation of vaccine efficacy

For a leaky vaccine, it is often the case that vaccine efficacy measured during a clinical trial, VE, and per-exposure reduction in the probability of transmission,  $1-\theta$ , have different values. In fact, these values are different any time trial participants are exposed more than once. On the one hand,  $\theta$  is not typically estimated in analyses of dengue vaccine trial results due to the infeasibility of counting the number of exposures that each individual experiences. On the other hand, any modeling analysis of vaccine impact requires estimates of  $\theta$  given that modeling vaccine impacts outside the context of the trial is the primary purpose of such an analysis.

Here, we explore the magnitude of the possible difference between VE and  $1-\theta$  in the context of phase-III Dengvaxia® vaccine trials as summarized by Hadinegoro et al. (2015). To do so, we apply logic presented by Halloran et al. (2010) for relating VE and  $1-\theta$  in the event of a fixed number of exposures  $n$ . To apply that result in the context of a variable number of exposures, we assumed an equal distribution of  $n$  in vaccinated and unvaccinated arms of the trial such that  $n \sim \text{Poisson}(FOI \Delta t)$ , where  $FOI$  is the force of infection and  $\Delta t$  is the duration of the trial.

For a fixed number of exposures  $n$  and a per-exposure probability of transmission  $p_0$ , Halloran et al. (2010) showed that

$$VE = 1 - \frac{1 - (1 - \theta p_0)^n}{1 - (1 - p_0)^n}.$$

Under our assumption that  $n$  follows a Poisson distribution with rate  $FOI\Delta t$ , the probability that a randomly selected trial participant experiences  $n$  exposures is

$$\Pr(n) = \frac{(FOI\Delta t)^n e^{-FOI\Delta t}}{n!}.$$

Variability in  $n$  can be incorporated into the result by Halloran et al. (2010) by applying the law of total probability separately in the numerator and denominator of the rightmost term in the first equation, yielding

$$VE = 1 - \frac{\sum_n (1 - (1 - \theta p_0)^n) \Pr(n)}{\sum_n (1 - (1 - p_0)^n) \Pr(n)}.$$

To explore the relationship between VE and  $1-\theta$ , we numerically solved for  $1-\theta$  given VE and  $FOI\Delta t$  in R across a range of values of those quantities. Consistent with the model and analysis in the main text, we assumed that  $p_0=1$ . Differences between VE and  $1-\theta$  were greatest for intermediate VE (Fig. S6), with the maximum percentage difference between VE and  $1-\theta$  ranging 4.8-13.4% between values of  $FOI\Delta t$  ranging 0.1-0.3.

The force of infection experienced in phase-III Dengvaxia® trials was highly heterogeneous across sites and over time, but values of  $FOI\Delta t$  over the course of those one-year trials generally were observed to be in this range of 0.1-0.3 (Coudeville et al. 2016). Altogether, this suggests that  $\theta$  may be slightly lower than VE, but likely only by 5% or less.

Based in part on this result that VE and  $1-\theta$  are not likely to differ by much, we chose to approximate  $1-\theta$  with VE in the main text. We also made this choice due to the fact that our primary objective in the main text was to make a qualitative point about the implications of different types of uncertainty in VE for vaccine impact projections rather than to make a quantitatively accurate vaccine impact projection. The latter is beyond the scope of this work and would ideally require better access to data resulting from the Dengvaxia® trials.

## References

Coudeville L, Baurin N, Vergu E. Estimation of parameters related to vaccine efficacy and dengue transmission from two large phase III studies. *Vaccine*. 2016;34:6417-6425.

Hadinegoro SR, Arredondo-García JL, Capeding MR, Deseda C, Chotpitayasunondh T, Dietze R, et al. Efficacy and Long-Term Safety of a Dengue Vaccine in Regions of Endemic Disease. *N Engl J Med*. 2015 Sep 24;373(13):1195–206.

Halloran ME, Longini IM, Struchiner CJ. *Design and Analysis of Vaccine Studies*. 2010. Springer. New York, NY.
